# Supplementary material
Source: PubMed Central journal article supplement (PMC6463925)
Supplement: fj.201802388R.sf1.pdf [file fj.201802388R.sf1.pdf]

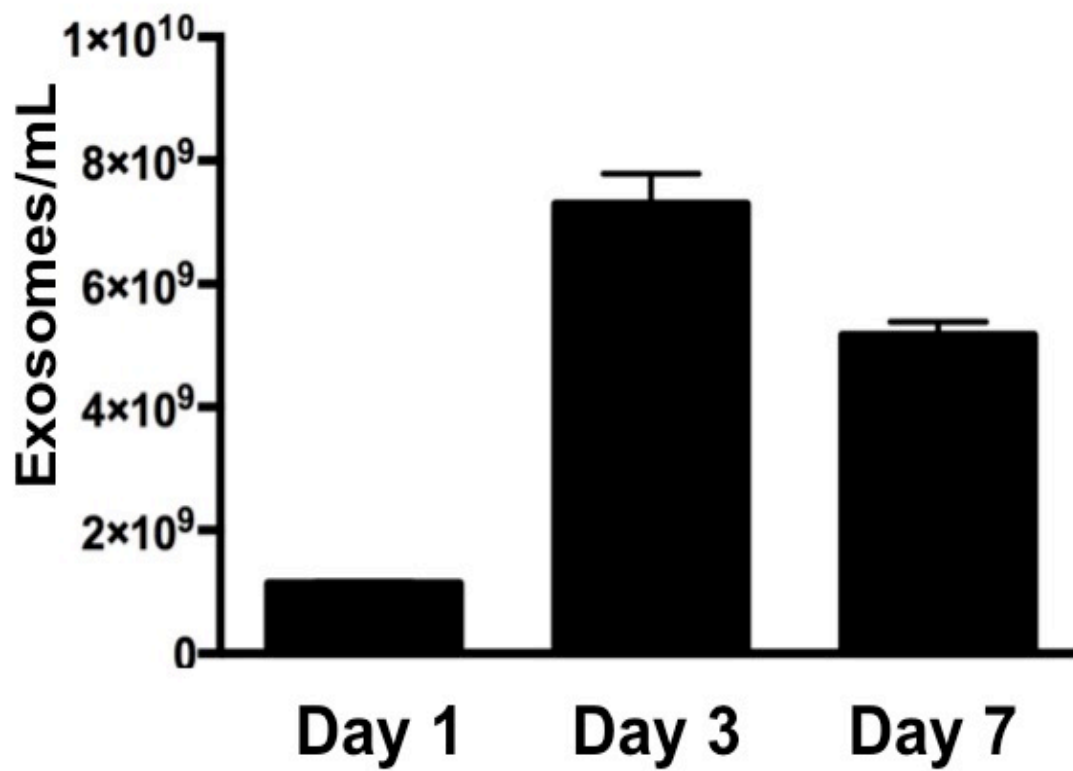

Supplementary Figure 1. EVs were collected from PVA sponge implants and enriched by serial centrifugation and analyzed by NTA as described in the Materials and Methods
